# Supplementary material
Source: PubMed Central journal article supplement (PMC2806193)
Supplement: NIHMS159831-supplement-Fig.pdf [file NIHMS159831-supplement-Fig.pdf]

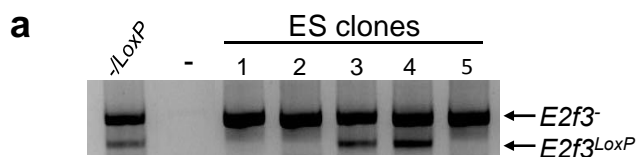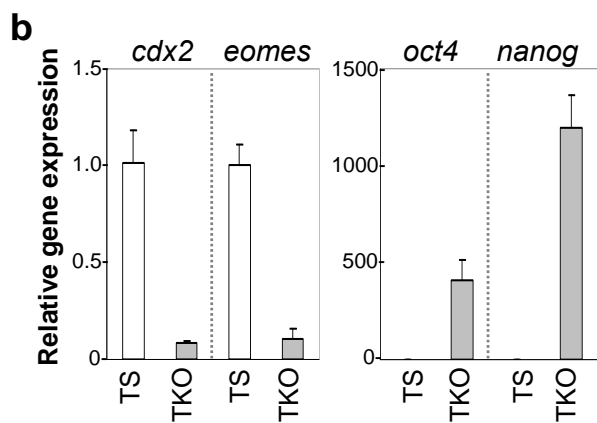

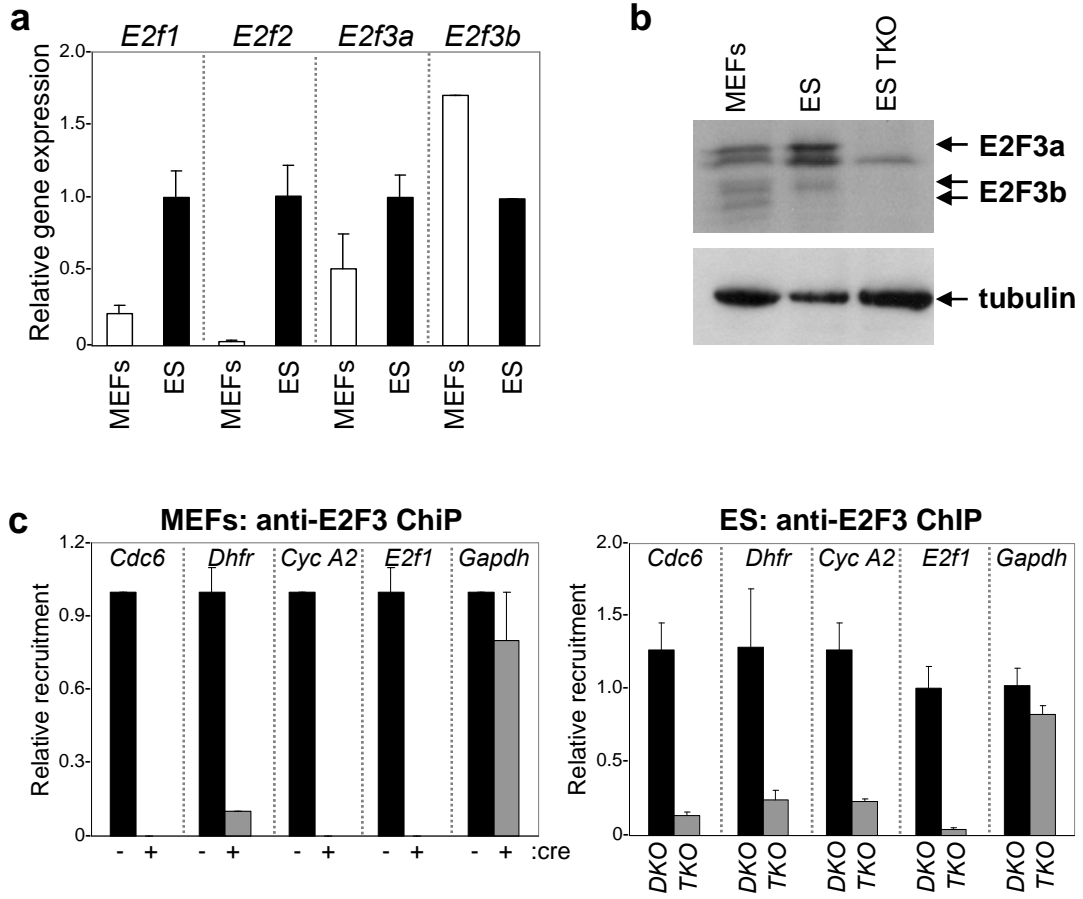

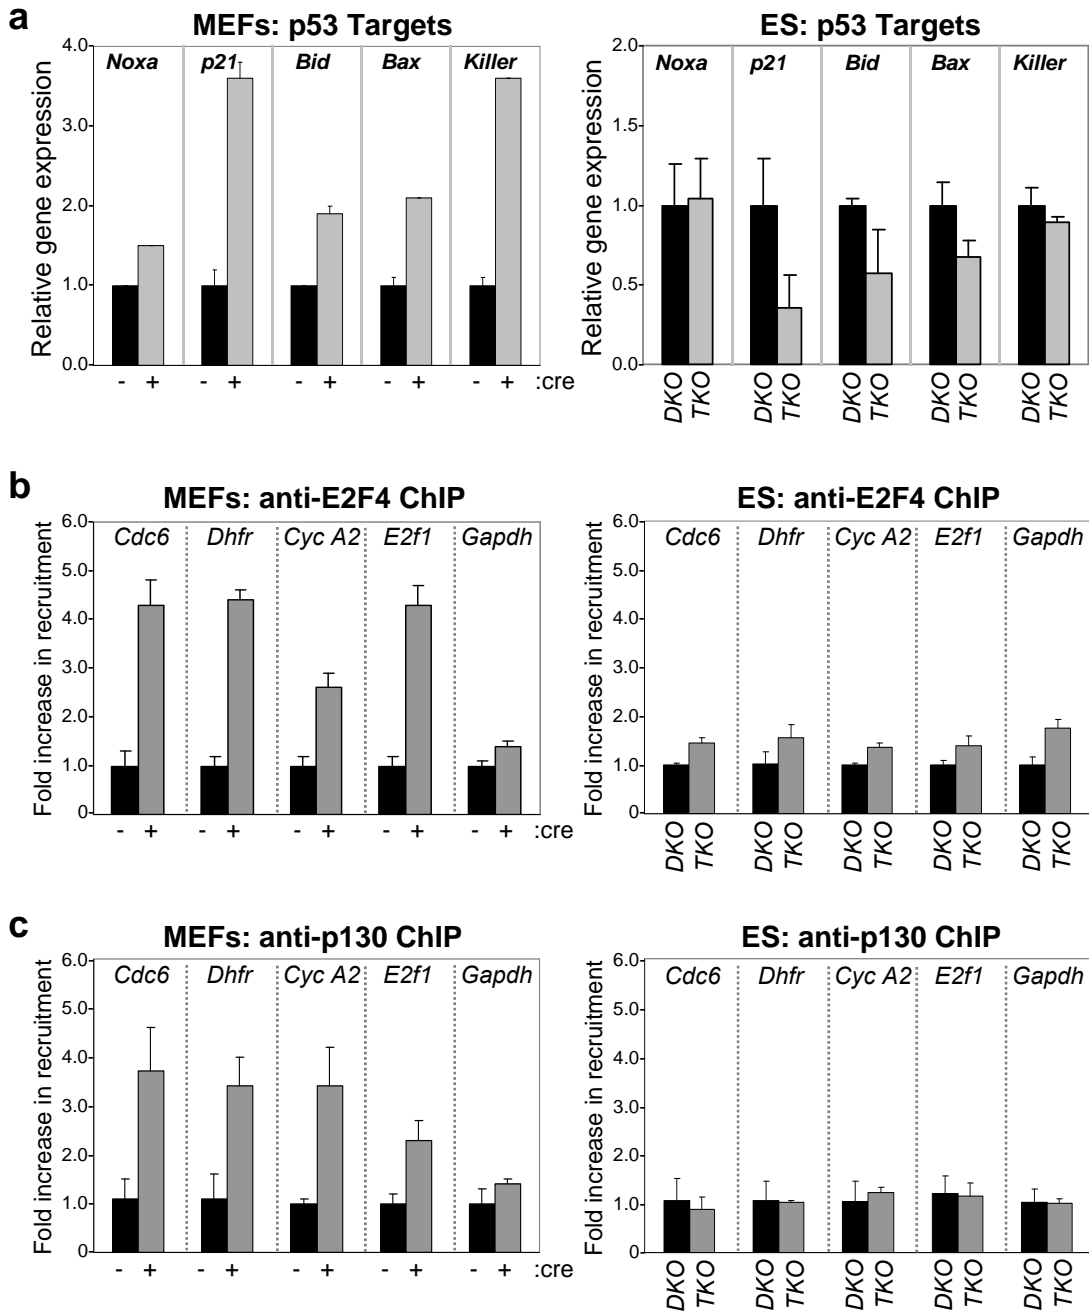

**a** Lineages present in teratomas derived from various ES cell lines

|                      | TC-1 | DKO | TKO |
|----------------------|------|-----|-----|
| Total # of teratomas | 7    | 12  | 17  |
| Neural               | 7    | 10  | 15  |
| Muscle               | 7    | 11  | 17  |
| Epithelial           | 7    | 12  | 13  |
| Skin                 | 1    | 7   | 3   |
| Inflammatory         | 7    | 12  | 10  |

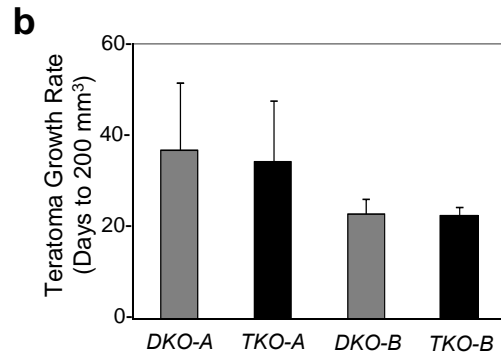

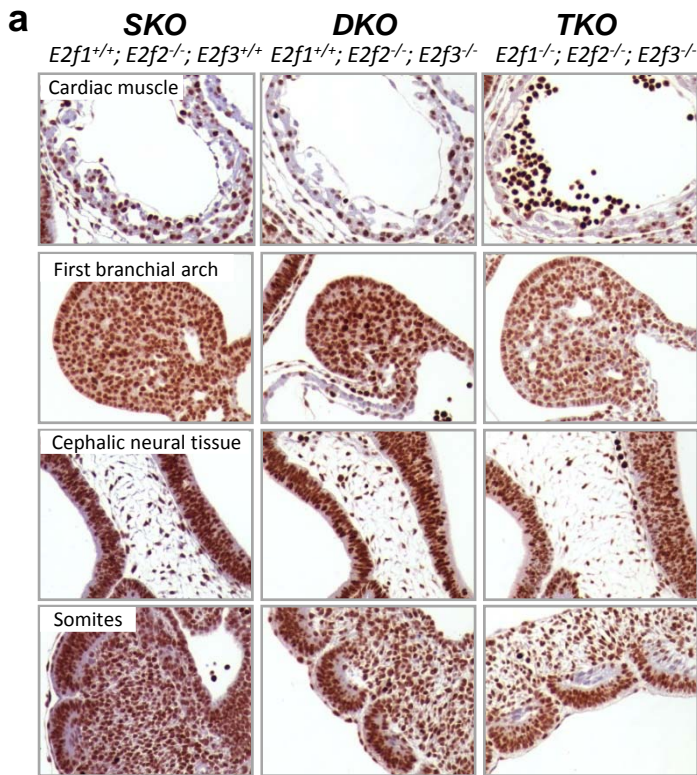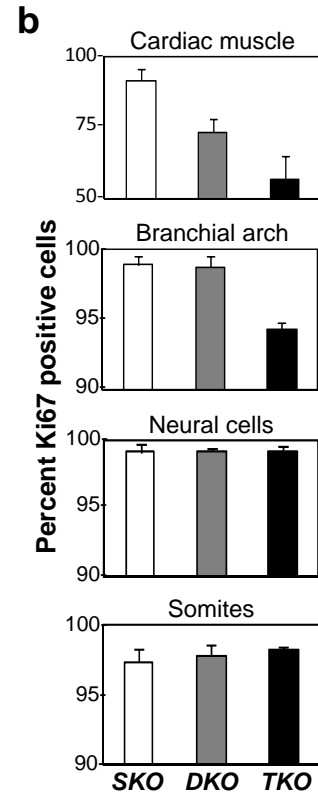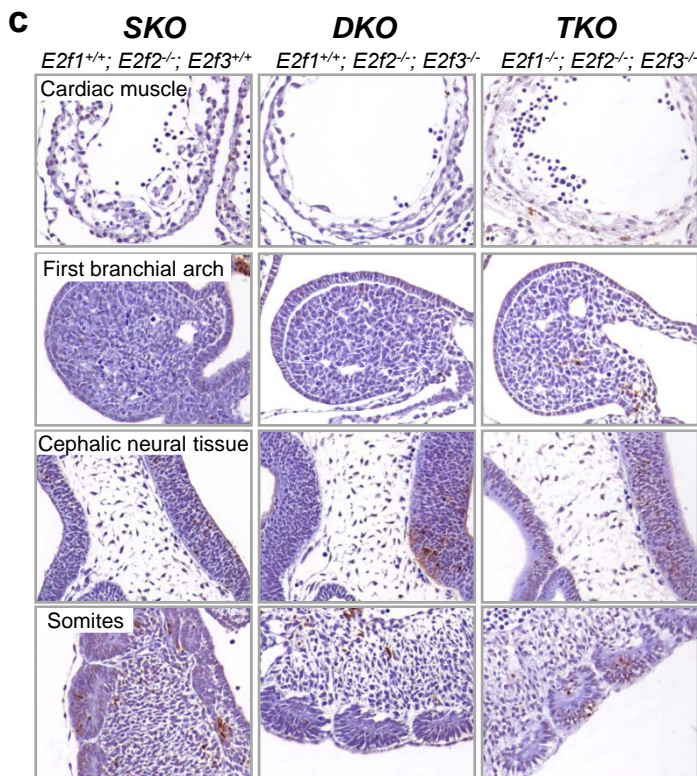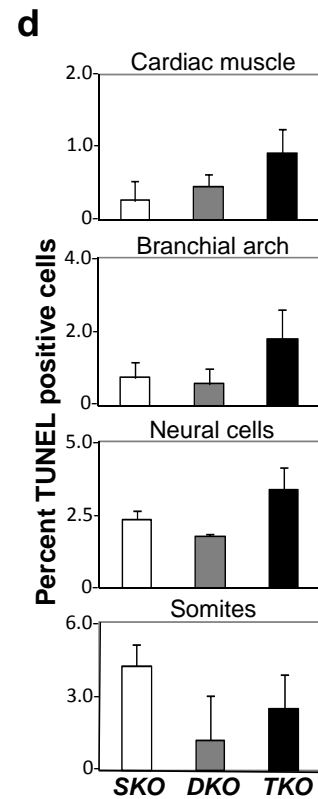

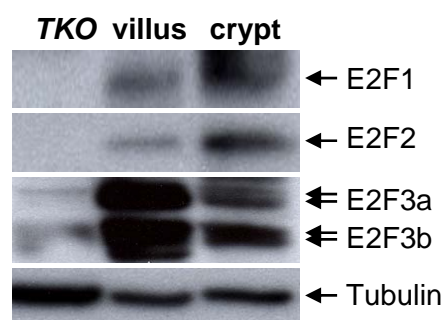

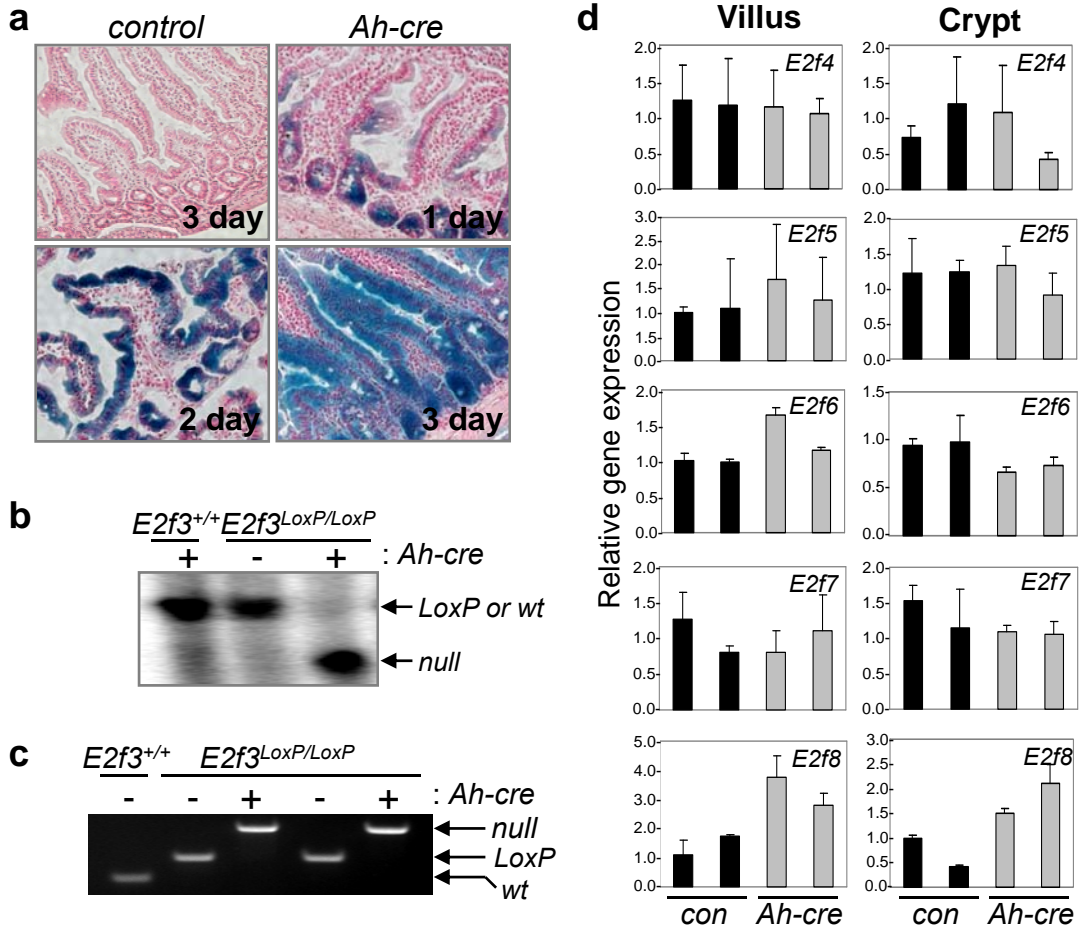

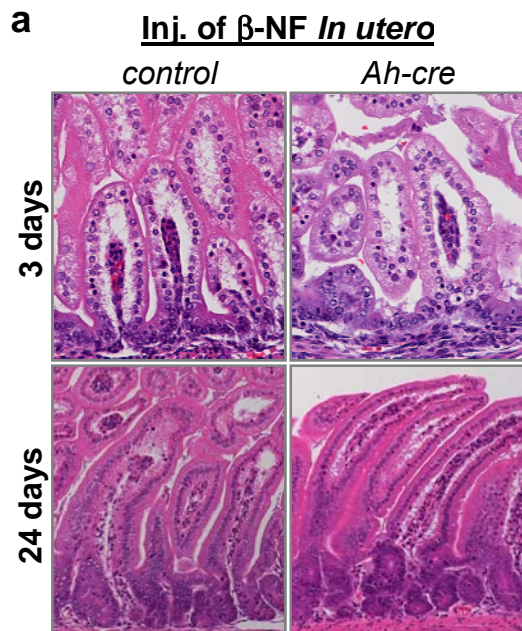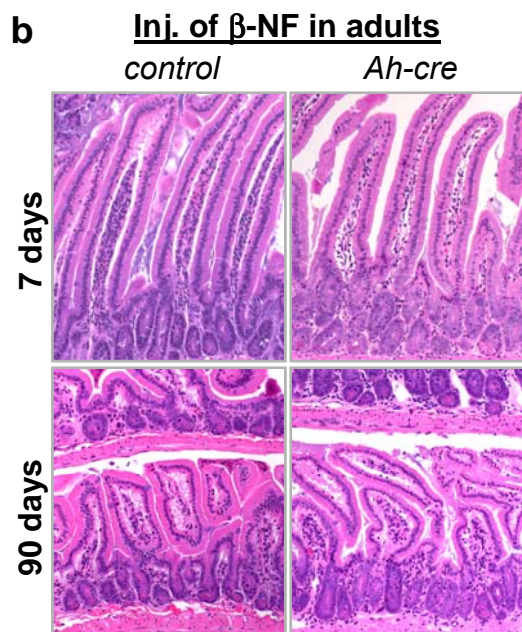



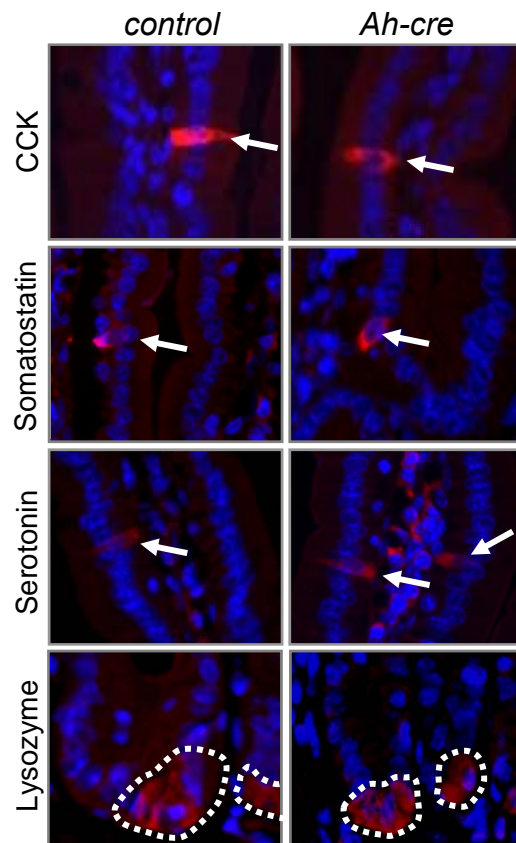

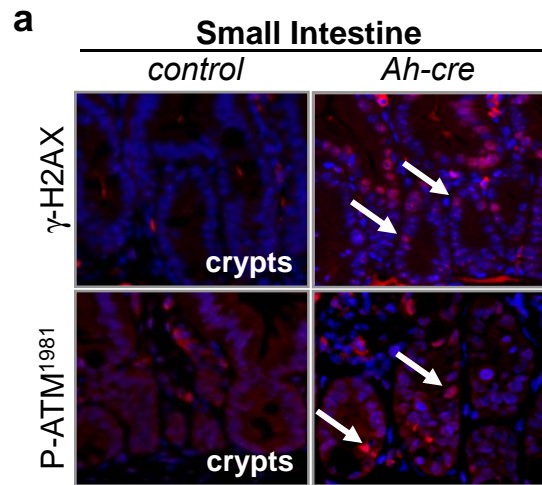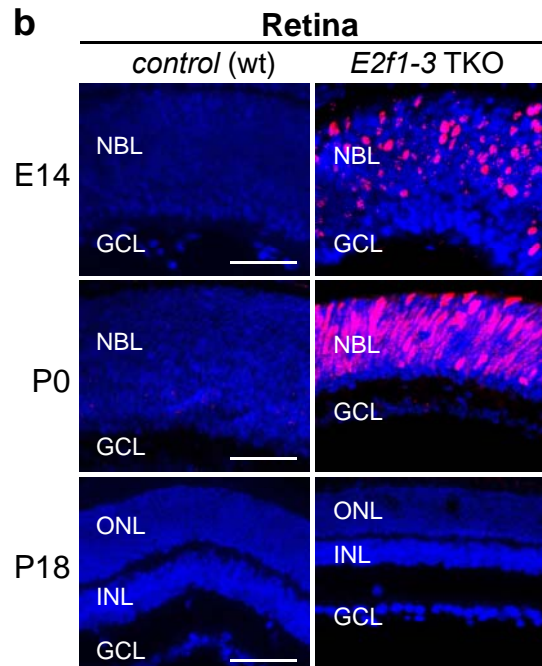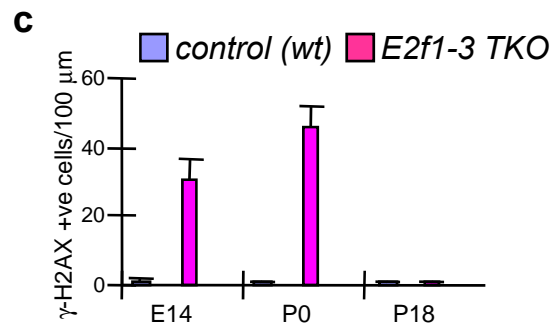

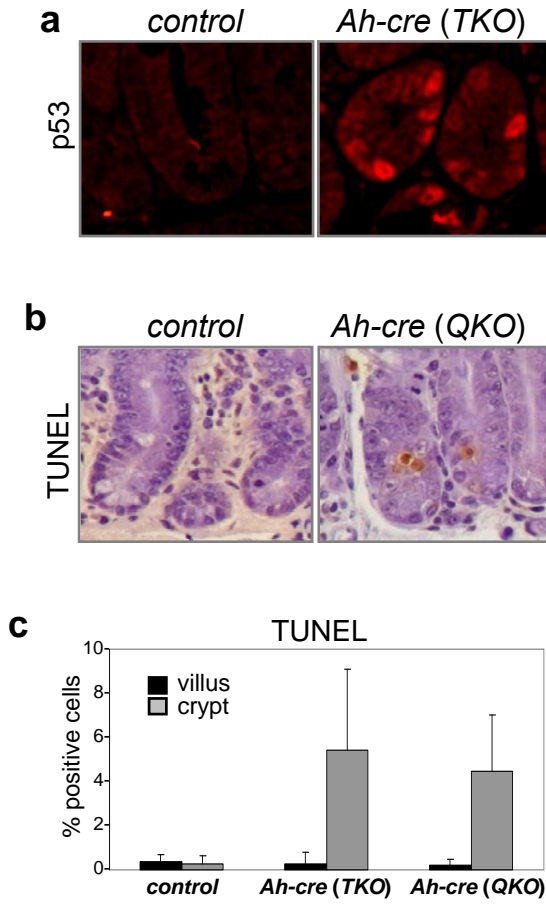

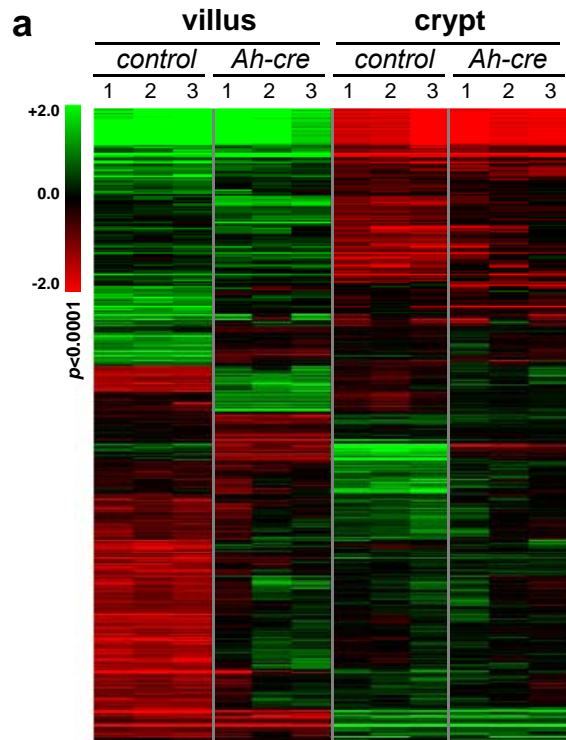

**b**

| Validated E2F target genes (regulated and bound by E2F transcription factors) |        |           |        |          |          |
|-------------------------------------------------------------------------------|--------|-----------|--------|----------|----------|
| ASF1B                                                                         | CDC25A | E2F3      | LMNB1  | PLK1     | RRM1     |
| BARD1                                                                         | CDC6   | FANCL     | MAP3K5 | POLD3    | SERPINE1 |
| BLM                                                                           | CDC7   | FEN1      | MCM3   | PRC1     | SMC2     |
| BNIP3                                                                         | CDCA3  | H2AFX     | MKI67  | RACGAP1  | SSX2IP   |
| BOK                                                                           | CDCA5  | HIST1H2AD | NASP   | RAD51    | TK1      |
| BRCA1                                                                         | CENPF  | HMGB2     | NRP1   | RAD51AP1 | TMPO     |
| BUB1                                                                          | CENPK  | HMMR      | NUF2   | RAD54L   | TOP2A    |
| BUB1B                                                                         | DLG7   | IQGAP3    | PBK    | RBL1     | TPX2     |
| CCDC5                                                                         | DNA2L  | KIF20A    | PBX3   | RFC3     | TYMS     |
| CCNA2                                                                         | E2F1   | KIF2C     | PCNA   | RFC4     | UBE2C    |

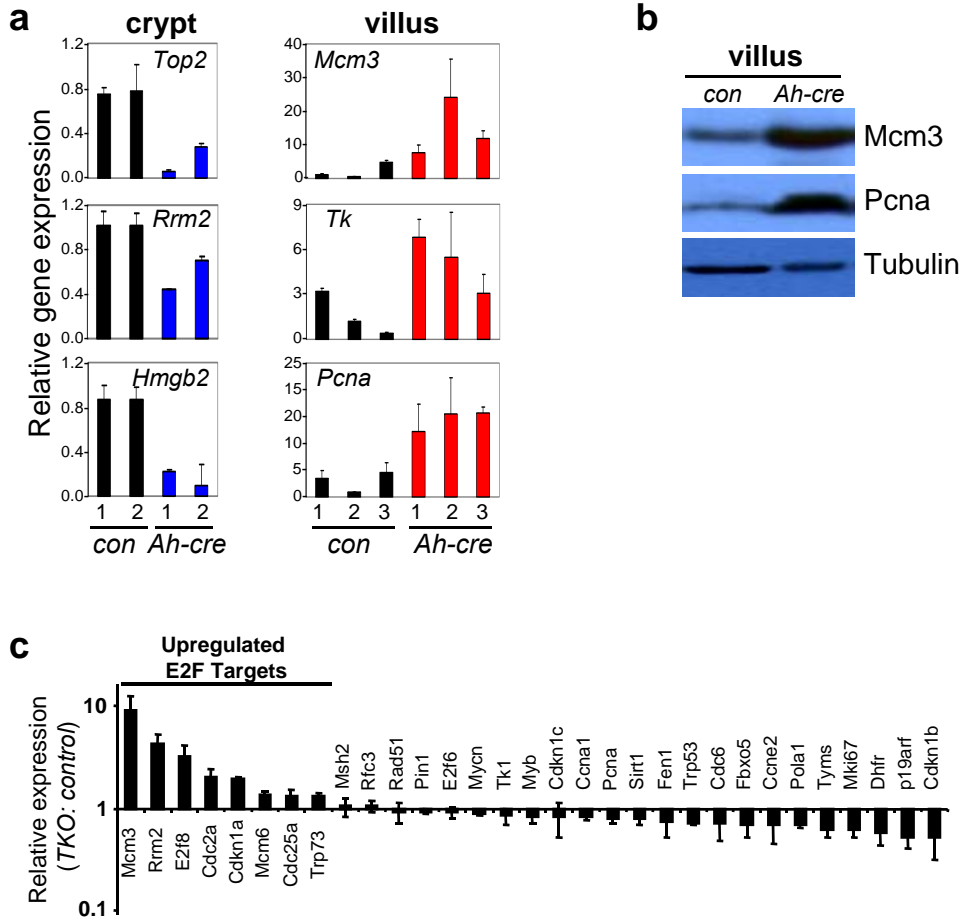

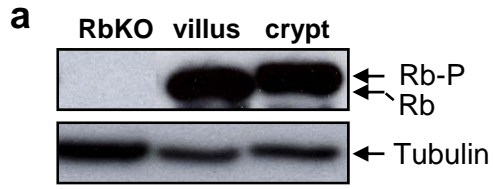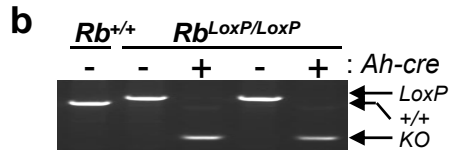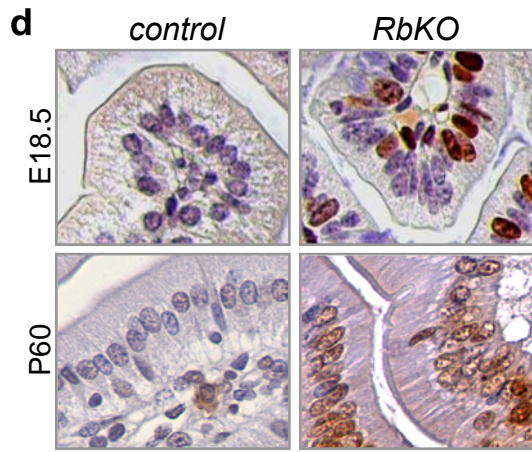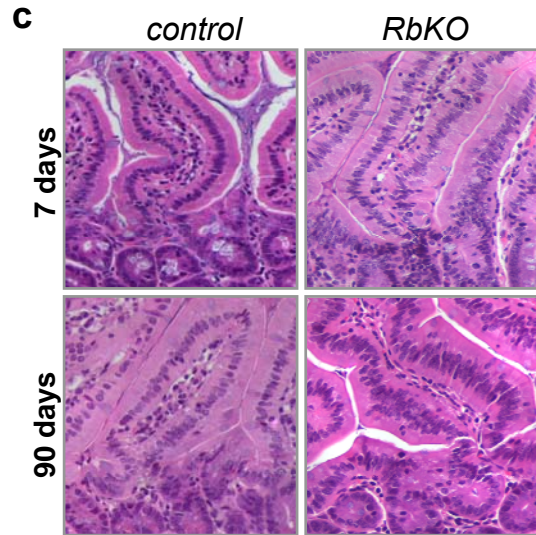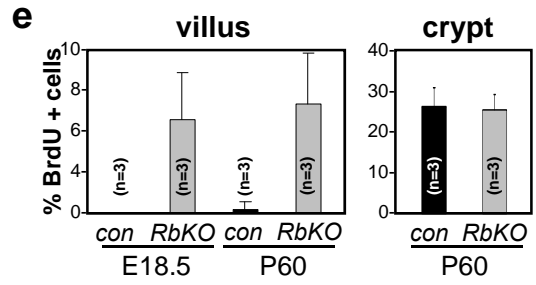

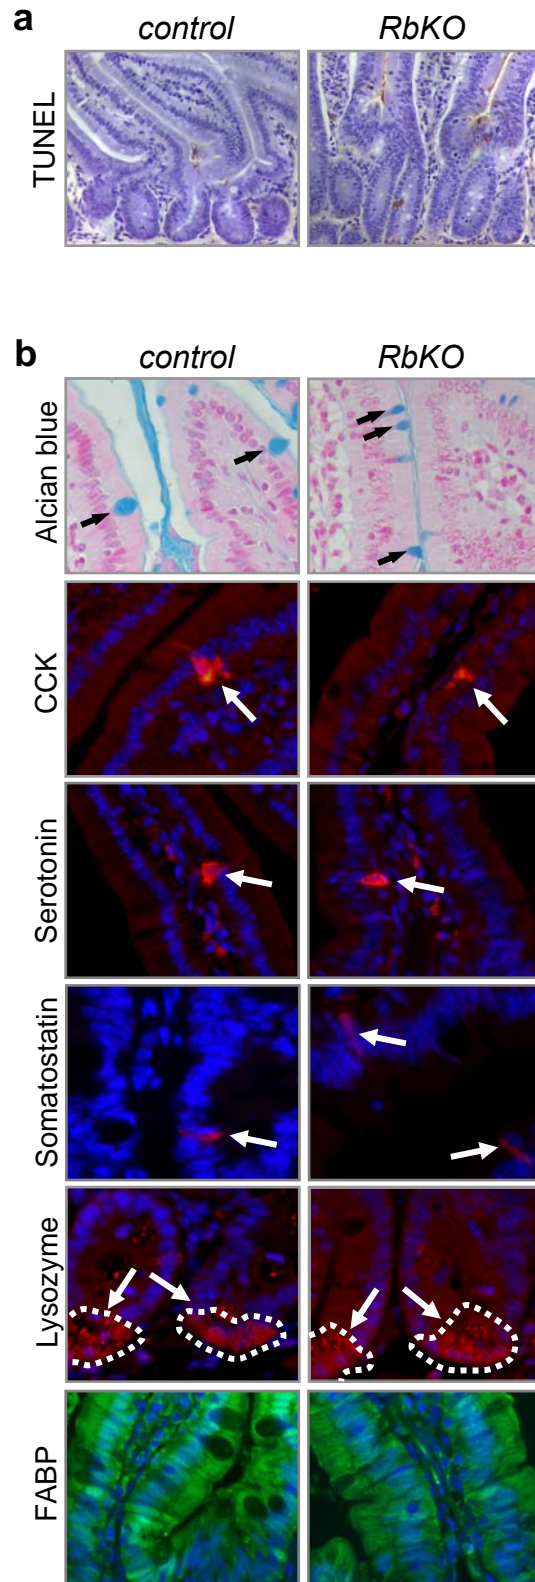

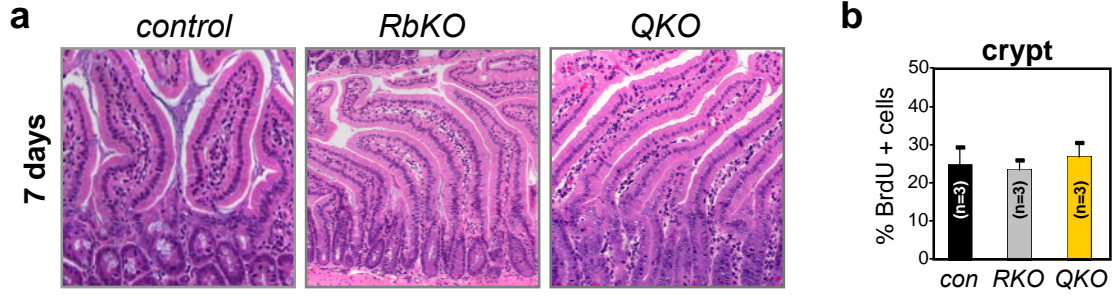



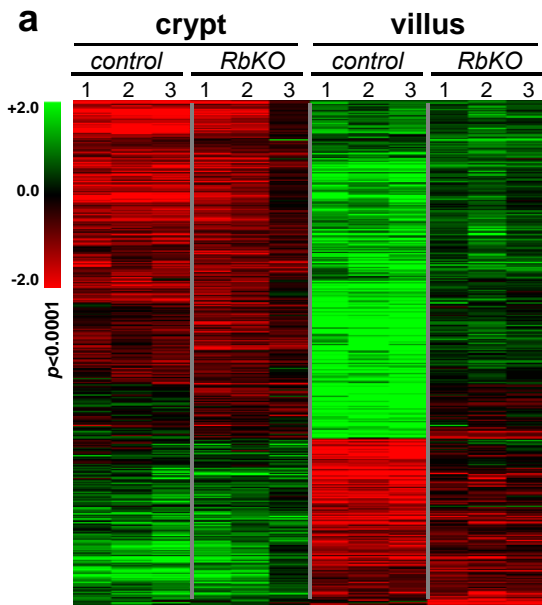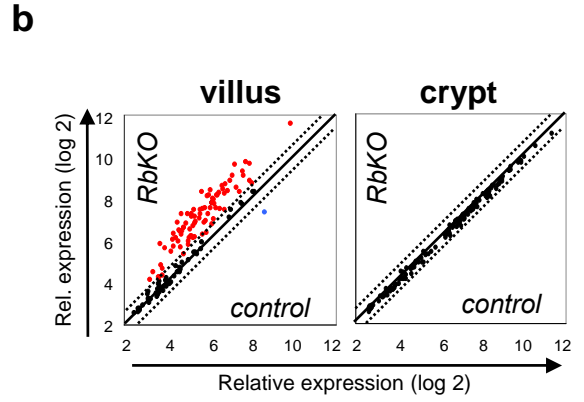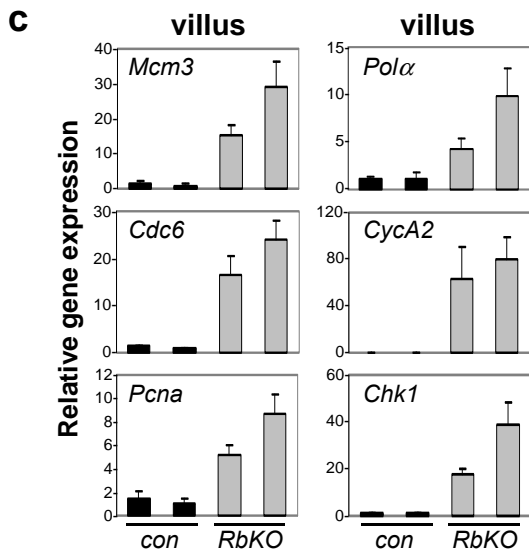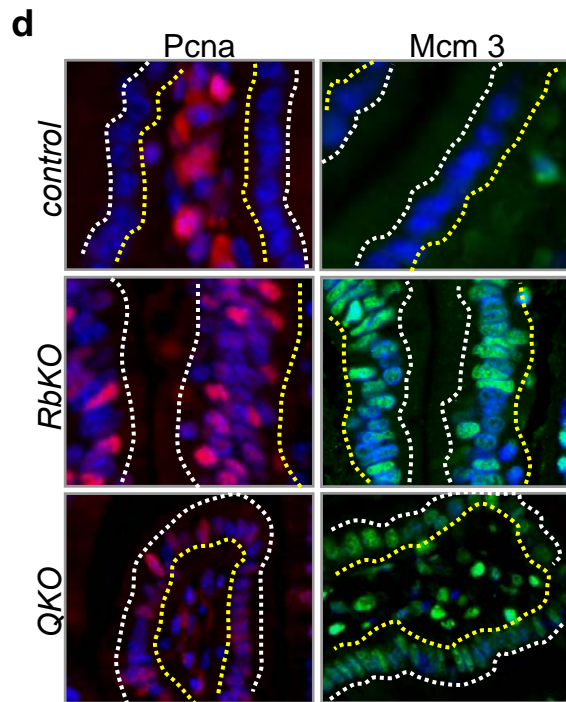

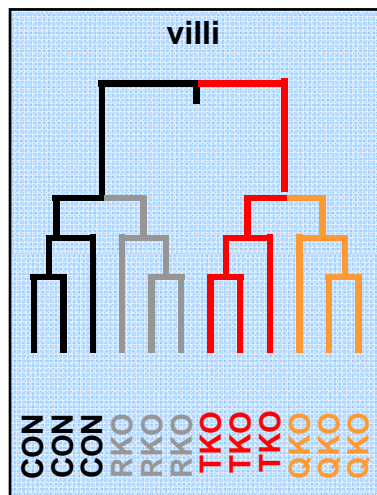

**a****Primers used for genotyping**

| Gene              | Sense primer(s)                                    | Antisense primer(s)                                 |
|-------------------|----------------------------------------------------|-----------------------------------------------------|
| <i>Ah-cre</i>     | CCTGACTAGCATGGCGATAC                               | ATTGCCCTGTTTCA CTATC                                |
| <i>Rb</i>         | GGCGTGTGCCATCAA TG                                 | CTCAAGAGCTCAGACTCATGG                               |
| <i>ROSA26 Rep</i> | AAAGTCGCTCTGAGTTGTTAT                              | GGAGCGGGAGAAATGGATAT<br>GCGAAGAGTTTGTCTCAACC        |
| <i>E2f1</i>       | AGAAGTCACGCTATGAAACCTCAC<br>AGTGCCAGCGGGGCTGCTAAAG | AGCCACTGGATATGATTCTTGAC                             |
| <i>E2f2</i>       | CCTGAGCGAGTCGGAGGATGG<br>ACCAAAGAACGGAGCCGGTTGGCG  | GCCCCTAACACATGCACCCATTGG                            |
| <i>E2f3</i>       | TGTGAATAATTTTTGGCATGTTTT                           | AAGGGAAGGGAAAATTAATCTGA<br>CTTATTCTGAGTGTGGACATACCG |

**b****Primers used for chromatin immunoprecipitation**

| Gene         | Sense primer(s)          | Antisense primer(s)      |
|--------------|--------------------------|--------------------------|
| <i>Cdc6</i>  | TGATGAGTGACAATAATCAG     | GAGCTTTGCACTCTTCAGG      |
| <i>CycA2</i> | TGTAAGATTCCCCTCGGGCCTTC  | AGGCGGGAGGAGCGTAGAGCC    |
| <i>CycE1</i> | AAGAACACGCCCCCGGGAGGCCAC | AAGCTGTGTCCGCCGAGGCAGGCG |
| <i>Mcm3</i>  | GTCTCTGCTCCATGCTTCTCCAC  | GCTTCCCGCAGCTCCACATCATC  |

**c****Antibodies used in this study**

| name                           | company        | Cat #     |
|--------------------------------|----------------|-----------|
| Anti-Mcm3                      | Santa Crus     | sc-9850   |
| Anti-Pcna                      | Santa Crus     | sc-56     |
| Anti-Atm-ps1981                | NOVUS          | NB600-622 |
| Anti-Phospho-H2AX (ser139)     | Upstate        | 05-636    |
| Anti-E2F3                      | Santa Crus     | sc-878    |
| Anti-Rb                        | BDPharmingen   | 554136    |
| Anti-Cholecystokinin           | Immunostar     | 20078     |
| Anti-L-Fabp                    | Santa Crus     | sc-16064  |
| Anti-lysozyme                  | Dako           | A0099     |
| Anti-serotonin                 | Dako           | M0758     |
| Anti-somatostatin              | Dako           | A0566     |
| anti-cleaved caspase-3         | Cell Signaling | 9661-L    |
| anti-phosphorylated histone H3 | Millipore      | 06-570    |

## Primers used for real-time RT-PCR

| Gene                     | Sense primer(s)           | Antisense primer(s)        |
|--------------------------|---------------------------|----------------------------|
| <i>Mcm3</i>              | CGCAGGAAGAATGAAAAGAGGG    | CTGAGGAAGCAGGAAGTGAGAGTC   |
| <i>Cdc6</i>              | AGTTCTGTGCCCGCAAAGTG      | AGCAGCAAAGAGCAAACCAGG      |
| <i>CycE1</i>             | GAGCAGGAGACAGAATGACCAAAC  | ACAGCAACCTACAACACCCGAG     |
| <i>Dhfr</i>              | GTAGAGAACTCAAAGAACCACCACG | TTTTCTCCTGGACCTCAGAGAG     |
| <i>Pola</i>              | TCTTCCCCTTCATTTCTCCCG     | TCTTCCCCTTCATTTCTCCCG      |
| <i>Pcna</i>              | AGGCTCTCAAAGACCTCATCAATG  | CCTGTTCTGGGATTCCAAGTTG     |
| <i>CycA2</i>             | CCCCCAGAAGTAGCAGACTTTGTG  | TGTGACTGTGTAGAGAGCCAAGTGG  |
| <i>p19<sup>ARF</sup></i> | CACCGGAATCCTGGACCAG       | GCAGTTCGAATCTGCACCGT       |
| <i>p21</i>               | CTTGTCGCTGTCTTGCACTC      | CTCCTGACCCACAGCAGAAG       |
| <i>Rrm2</i>              | AGAGGATGGGAGTCATGTCTG     | CTTTAATGGCAAGGGGACA        |
| <i>Hmgb2</i>             | CGCGGAGAACTCTGCAAAACAAG   | CGAAGAAGGCGTACGAGGACATT    |
| <i>top 2</i>             | CACCGCTGCAGCCTGTAAATGA    | CACATTTGCTGGGTCACTAACTCCAC |
| <i>GAPDH</i>             | CGGTGTGAACGGATTTGGC       | TTTGATGTTAGTGGGGTCTCGC     |
| <i>E2f4</i>              | CTTCTACCTCCTTTGAGCCATC    | TCACAGACACCTTCACTCTCGTCC   |
| <i>E2f5</i>              | ACCTGATGACCTCACACAGCCTTC  | GGGGTAGGAGAAAGCCGTAAAAG    |
| <i>E2f6</i>              | CATCCACAATGCCCAGAGAAAAG   | CAATAGAGCACAAGAGCACTCCG    |
| <i>E2f7</i>              | GCCAAGCAGGAAACAGAAGA      | ACCGTGCCAACCATACTGAT       |
| <i>E2f8</i>              | GAGAAATCCCAGCCGAGTC       | CATAAATCCGCCGACGTT         |
| <i>Cdc2a</i>             | ATGATCCTGCCAAACGAATC      | TCCATCCAGAGGGCTACATC       |
| <i>Cdkn1a</i>            | GTGGCCTTGTGCTGTCTT        | GCGCTTGGAGTGATAGAAATCTG    |
| <i>Mcm6</i>              | CTGAAAGGCTCCAGTGAAGG      | GTCCCTGGCCATCAAGTTAC       |
| <i>Trp73</i>             | GCCCATCAAAGAGGAGTTCA      | TCCCACTTCCAAGAGCAGTT       |
| <i>Cdc25a</i>            | AGTCGCCTGAAGAAGCTCTG      | CCCCTTTGCTTACTGCTCTG       |
| <i>Msh2</i>              | TCAAGCAGGTGCCCTTACT       | GTTGTTCTTTGCGACCACCT       |
| <i>Rfc3</i>              | GTGGCGAAGTTTATGGCACT      | CATCTGTTGTGCTTGAGGA        |
| <i>Rad51</i>             | TGGGGCAGTCTTTTGTCTTC      | ACCACCCATTCCCACTTACA       |
| <i>Pin1</i>              | AAAGCAGACGCTCCATACCTG     | CCAGATTTAATGGAAGGTGCG      |
| <i>Myc</i>               | CAGATCAGCAACAACCGCAA      | GACGTTGTGTGTCCGCCTCT       |
| <i>Myb</i>               | GCGTTCTCAGCTCGAACTCT      | GAGCCATGTGTGCGAAAGTCA      |
| <i>Sirt1</i>             | GGAGTCAGCACCGTGTCTGG      | GGGCCTGTTTGGACATTACCA      |
| <i>Fen1</i>              | TCCTGATTGCTGTTTCGTGAG     | ATGCGGATGGTACGGTAGAA       |
| <i>Fbox5</i>             | CAAACGGGAAAGCTGTCAAT      | GGCAAAGGACCCACTTTTACA      |
| <i>Ccne2</i>             | TGTTACAGGAGGTTTGGCA       | GGTCCAGGTGAGAATGCAGA       |
| <i>Tyms</i>              | CGTGCAGGATAGGGTGAAGT      | TGGAGCCTTCTCCCTAGAT        |
| <i>Ki67</i>              | GAGTGAGAGGGCAGTTCTGG      | GCTGCAGTAACTGTGGGTCA       |
| <i>Cdkn1b</i>            | TCTCTTCGGCCCGGTCAAT       | GGGGCTTATGATTCTGAAAGTCG    |
